# Supplementary material
Source: PubMed Central journal article supplement (PMC4993665)
Supplement: NIHMS794862-supplement-Supplemental_Digital_Content.pdf [file NIHMS794862-supplement-Supplemental_Digital_Content.pdf]

## Appendix 1.

In addition to the authors, other members of the *Eunice Kennedy Shriver* National Institute of Child Health and Human Development Maternal-Fetal Medicine Units Network are as follows:

Brown University, Providence, RI – D. Rouse, P. Breault, F. Smith, N. Annunziata, D. Allard, J. Silva, M. Gamage, J. Hunt, J. Tillinghast, N. Corcoran, M. Jimenez

University of Alabama at Birmingham, Birmingham, AL – M. Wallace, A. Northen, J. Grant, C. Colquitt

Northwestern University, Chicago, IL – G. Mallett, M. Ramos-Brinson, A. Roy, L. Stein, P. Campbell, C. Collins, N. Jackson, M. Dinsmoor (NorthShore University HealthSystem), J. Senka (NorthShore University HealthSystem), K. Paychek (NorthShore University HealthSystem), A. Peaceman

Columbia University, New York, NY – M. Talucci, M. Zylfijaj, Z. Reid (Drexel U.), R. Leed (Drexel U.), J. Benson (Christiana H.), S. Forester (Christiana H.), C. Kitto (Christiana H.), S. Davis (St. Peter's UH.), M. Falk (St. Peter's UH.), C. Perez (St. Peter's UH.)

University of Utah Health Sciences Center, Salt Lake City, UT – K. Hill, A. Sowles, J. Postma (LDS Hospital), S. Alexander (LDS Hospital), G. Andersen (LDS Hospital), V. Scott (McKay-Dee), V. Morby (McKay-Dee), K. Jolley (UVRMC), J. Miller (UVRMC), B. Berg (UVRMC)

University of North Carolina at Chapel Hill, Chapel Hill, NC – K. Dorman, J. Mitchell, E. Kaluta, K. Clark (WakeMed), K. Spicer (WakeMed), S. Timlin (Rex), K. Wilson (Rex)

University of Texas Southwestern Medical Center, Dallas, TX – K. Leveno, L. Moseley, M. Santillan, J. Price, K. Buentipo, V. Bludau, T. Thomas, L. Fay, C. Melton, J. Kingsbery, R. Benezue

University of Pittsburgh, Pittsburgh, PA– S. Caritis, H. Simhan, M. Bickus, D. Fischer, T. Kamon (deceased), D. DeAngelis

Froehlich RJ, Sandoval G, Bailit JL, Grobman WA, Reddy UM, Wapner RJ, et al. Association of recorded estimated fetal weight and cesarean delivery in attempted vaginal delivery at term. *Obstet Gynecol* 2016; 128.

The authors provided this information as a supplement to their article.

Case Western Reserve University-MetroHealth Medical Center, Cleveland, OH – B. Mercer, C. Milluzzi, W. Dalton, T. Dotson, P. McDonald, C. Brezine, A. McGrail

The Ohio State University, Columbus, OH – C. Latimer, L. Guzzo (St. Ann's), F. Johnson, L. Gerwig (St. Ann's), S. Fyffe, D. Loux (St. Ann's), S. Frantz, D. Cline, S. Wylie, P. Shubert (St. Ann's)

University of Texas Medical Branch, Galveston, TX – J. Moss, A. Salazar, A. Acosta, G. Hankins

Wayne State University, Detroit, MI – N. Hauff, L. Palmer, P. Lockhart, D. Driscoll, L. Wynn, C. Sudz, D. Dengate, C. Girard, S. Field

The University of Texas Health Science Center at Houston-Children's Memorial Hermann Hospital, Houston, TX – F. Ortiz, P. Givens, B. Rech, C. Moran, M. Hutchinson, Z. Spears, C. Carreno, B. Heaps, G. Zamora

Oregon Health & Science University, Portland, OR– J. Seguin, M. Rincon, J. Snyder, C. Farrar, E. Lairson, C. Bonino, W. Smith (Kaiser Permanente), K. Beach (Kaiser Permanente), S. Van Dyke (Kaiser Permanente), S. Butcher (Kaiser Permanente)

The George Washington University Biostatistics Center, Washington, DC – E. Thom, M. Rice, Y. Zhao, P. McGee, V. Momirova, R. Palugod, B. Reamer, M. Larsen, T. Williams

*Eunice Kennedy Shriver* National Institute of Child Health and Human Development, Bethesda, MD – C. Spong, S. Tolivaia

MFMU Network Steering Committee Chair (*Medical University of South Carolina, Charleston, SC*) – J. P. VanDorsten, M.D.

Froehlich RJ, Sandoval G, Bailit JL, Grobman WA, Reddy UM, Wapner RJ, et al. Association of recorded estimated fetal weight and cesarean delivery in attempted vaginal delivery at term. *Obstet Gynecol* 2016; 128.

The authors provided this information as a supplement to their article.

## Appendix 2. Correlation of Estimated Fetal Weight (EFW) and Actual Birth Weight Values by EFW Method

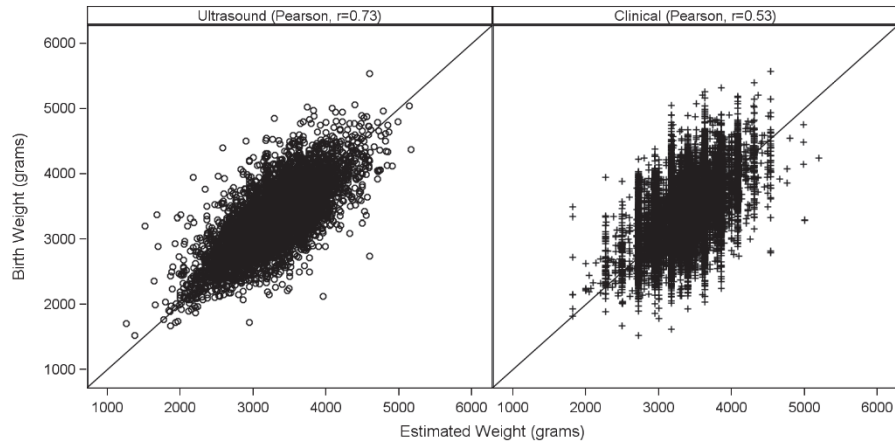

Froehlich RJ, Sandoval G, Bailit JL, Grobman WA, Reddy UM, Wapner RJ, et al. Association of recorded estimated fetal weight and cesarean delivery in attempted vaginal delivery at term. *Obstet Gynecol* 2016; 128.

The authors provided this information as a supplement to their article.
